# Supplementary material for: High-efficiency multiphoton boson sampling
Source: Springer Nature journal article supplement (doi:10.1038/nphoton.2017.63), 2017-05-01
Supplement: nphoton.2017.63-s1.pdf [file nphoton.2017.63-s1.pdf]

Browse Articles
| Nature Photonics


Skip to main content

Thank you for visiting nature.com. You are using a browser version with limited support for CSS. To obtain
the best experience, we recommend you use a more up to date browser (or turn off compatibility mode in
Internet Explorer). In the meantime, to ensure continued support, we are displaying the site without styles
and JavaScript.

Advertisement


- View all journals
- Search
- Log in

- Explore content
- About the journal
- Publish with us

- Sign up for alerts
- RSS feed


1. nature
2. nature photonics
3. browse articles

# Browse Articles

## Filter By:

Article Type

All

- All
- Article (945)
- Author Correction (37)
- Books & Arts (50)
- Business News (26)
- Comment (24)
- Commentary (72)
- Correction (29)
- Correspondence (59)
- Corrigendum (24)
- Editorial (181)
- Industry Perspective (66)
- Interview (142)
- Letter (713)
- News & Views (1085)
- Product Focus (26)
- Product Highlights (26)
- Publisher Correction (32)
- Research Highlight (106)
- Research Highlights (684)
- Review Article (168)

Year

All

- All
- 2024 (86)
- 2023 (210)
- 2022 (196)
- 2021 (195)
- 2020 (171)
- 2019 (234)
- 2018 (253)
- 2017 (262)
- 2016 (264)
- 2015 (267)
- 2014 (333)
- 2013 (376)
- 2012 (359)
- 2011 (313)
- 2010 (311)
- 2009 (264)
- 2008 (284)
- 2007 (266)
- 2006 (47)

- ### Attosecond core-level absorption spectroscopy reveals the electronic and nuclear dynamics of molecular ring opening

  Attosecond core-level spectroscopy is used to probe the ultrafast molecular dynamics of furan at the carbon K-edge, demonstrating its ability to simultaneously probe electronic and vibrational dynamics.

  - S. Severino
  - K. M. Ziems
  - J. Biegert

  Article29 Apr 2024
- ### Sub-cycle photonics in correlated materials

  Sub-cycle confinement and control of phase transitions in strongly correlated materials are theoretically demonstrated, potentially providing a way to investigate electron dynamics on timescales previously unattainable with these materials.

  - Eleftherios Goulielmakis

  News & Views26 Apr 2024
- ### Turnkey locking of quantum-dot lasers directly grown on Si

  A quantum-dot laser directly grown on silicon that is scalable, low cost with an intrinsic linewidth of 16 Hz when subject to feedback from a low-quality-factor external cavity is reported.

  - Bozhang Dong
  - Yating Wan
  - John E. Bowers

  ArticleOpen Access26 Apr 2024
- ### Reviving holographic photonic integration

  Holographic waveguides using shallow etching of silicon-on-insulator waveguides makes designing integrated, preset optical vector matrix multiplication computationally tractable and commercially available.

  - Daniel Brunner

  News & Views24 Apr 2024
- ### Observation of Landau levels and chiral edge states in photonic crystals through pseudomagnetic fields induced by synthetic strain

  Strain-engineered pseudomagnetic fields realized in two-dimensional photonic crystals induce flat-band Landau levels at discrete energies as well as chiral edge states. The high density of states and high degeneracy of the flat bands has implications for both on-chip and radiating light fields.

  - René Barczyk
  - L. Kuipers
  - Ewold Verhagen

  Article23 Apr 2024
- ### Non-reciprocal band structures in an exciton–polariton Floquet optical lattice

  A frequency detuning between two pump lasers enables an exciton–polariton Floquet optical lattice and a polariton ‘conveyor belt’. The findings pave the way for Floquet engineering in polariton condensates.

  - Yago del Valle Inclan Redondo
  - Xingran Xu
  - Michael D. Fraser

  ArticleOpen Access23 Apr 2024
- ### Direct observation of Landau levels in silicon photonic crystals

  Photonic Landau levels are demonstrated via a strain-induced pseudomagnetic field in a silicon photonic crystal slab.

  - Maria Barsukova
  - Fabien Grisé
  - Mikael C. Rechtsman

  Article23 Apr 2024
- ### Electrochemically controlled blinking of fluorophores for quantitative STORM imaging

  Electrochemical control of the switching of fluorophores in stochastic optical reconstruction microscopy (EC-STORM) enables the counting of single fluorophores as well as cell imaging with improved spatial resolution and reduced artefacts compared with traditional STORM.

  - Ying Yang
  - Yuanqing Ma
  - J. Justin Gooding

  ArticleOpen Access19 Apr 2024
- ### Author Correction: Parametrically driven pure-Kerr temporal solitons in a chip-integrated microcavity

  - Grégory Moille
  - Miriam Leonhardt
  - Miro Erkintalo

  Author Correction18 Apr 2024
- ### Random-access wide-field mesoscopy for centimetre-scale imaging of biodynamics with subcellular resolution

  Random-access wide-field mesoscopy enables the imaging of in vivo biodynamics in mice over an area of 160 mm2 and at a subcellular spatial resolution of about 2 μm.

  - Ruheng Shi
  - Xinyue Chen
  - Lingjie Kong

  ArticleOpen Access17 Apr 2024
- ### Mid-infrared wide-field nanoscopy

  Wide-field mid-infrared photothermal imaging is developed to supress the resolution degradation caused by photo-thermal heat diffusion. By employing a single-objective synthetic-aperture imaging with synchronized subnanosecond mid-infrared and visible light sources, spatial resolution of 120 nm is obtained.

  - Miu Tamamitsu
  - Keiichiro Toda
  - Takuro Ideguchi

  Article17 Apr 2024
- ### Experimental demonstration of attosecond pump–probe spectroscopy with an X-ray free-electron laser

  Researchers have demonstrated the generation and control of subfemtosecond pulse pairs from a two-colour X-ray free-electron laser and conducted pump–probe experiments in core-ionized molecules.

  - Zhaoheng Guo
  - Taran Driver
  - Agostino Marinelli

  Article11 Apr 2024
- ### Nonreciprocal thermal photonics

  This Review discusses the physics of nonreciprocal radiation and Kirchhoff’s law generalization in the context of nanophotonics-enabled nonreciprocal thermal applications.

  - Shuihua Yang
  - Mengqi Liu
  - Cheng-Wei Qiu

  Review Article10 Apr 2024
- ### Epsilon-near-zero regime enables permanent ultrafast all-optical reversal of ferroelectric polarization

  Researchers reveal that naturally emerging epsilon-near-zero conditions in BaTiO3 can be exploited to drive permanent all-optical switching of ferroelectric polarization. The general nature of the epsilon-near-zero regime means that the approach could be used to switch spontaneous order parameters in other systems.

  - M. Kwaaitaal
  - D. G. Lourens
  - A. Kirilyuk

  Article09 Apr 2024
- ### Avalanche photodiode with ultrahigh gain–bandwidth product of 1,033 GHz

  Researchers demonstrate a germanium/silicon avalanche photodiode gain–bandwidth product over 1 THz operating at 1,550 nm wavelength. The findings have implications for future high-speed optoelectronic devices in next-generation optical interconnects.

  - Yang Shi
  - Xiang Li
  - Xinliang Zhang

  Article09 Apr 2024
- ### Metasurfaces for edge encoding with incoherent light

  - David Pile

  News & Views05 Apr 2024
- ### Cryogenic optical data link for superconducting circuits

  An optical fibre-fed superconducting electro-optic modulator with gigahertz bandwidth and attojoule per bit electric power consumption offers a fast, efficient means to connect superconducting circuits to the room temperature environment.

  - Paolo Pintus
  - Mo Soltani
  - Galan Moody

  News & Views05 Apr 2024
- ### Illuminating cancer with sonoafterglow

  Ultrasound-induced luminescence in trianthracene derivative-based nanoparticles enables tumour imaging and immunological profiling in a variety of in vivo models.

  - Cheng Xu
  - Kanyi Pu

  News & Views05 Apr 2024
- ### Single protein imaging with holography

  A non-common-path interferometric scheme enables holographic detection of single proteins of mass 90 kDa and estimation of single-protein polarizability.

  - Chia-Lung Hsieh

  News & Views05 Apr 2024
- ### Optical manipulation of spin resonance in gallium nitride

  A common direct-bandgap semiconductor has been found to host optically addressable spins, opening the door to scalable quantum sensor manufacturing.

  - Jake Horder
  - Igor Aharonovich

  News & Views05 Apr 2024

- Previous page
- page 1
- page 2
- page 3
- …
- page 235
- Next page

## Explore content

- Research articles
- Reviews & Analysis
- News & Comment
- Current issue
- Collections

- Follow us on Twitter
- Sign up for alerts
- RSS feed


## About the journal

- Aims & Scope
- Journal Information
- Journal Metrics
- About the Editors
- Our publishing models
- Editorial Values Statement
- Editorial Policies
- Content Types
- Web Feeds
- Contact
- Research Cross-Journal Editorial Team
- Reviews Cross-Journal Editorial Team


## Publish with us

- Submission Guidelines
- For Reviewers
- Language editing services
- Submit manuscript

## Search

Search articles by subject, keyword or author

Show results from

All journals
This journal

Search

Advanced search

### Quick links

- Explore articles by subject
- Find a job
- Guide to authors
- Editorial policies

Nature Photonics (*Nat. Photon.*)

ISSN 1749-4893 (online)

ISSN 1749-4885 (print)

## nature.com sitemap

### About Nature Portfolio

- About us
- Press releases
- Press office
- Contact us

### Discover content

- Journals A-Z
- Articles by subject
- protocols.io
- Nature Index

### Publishing policies

- Nature portfolio policies
- Open access

### Author & Researcher services

- Reprints & permissions
- Research data
- Language editing
- Scientific editing
- Nature Masterclasses
- Research Solutions

### Libraries & institutions

- Librarian service & tools
- Librarian portal
- Open research
- Recommend to library

### Advertising & partnerships

- Advertising
- Partnerships & Services
- Media kits
- Branded
  content

### Professional development

- Nature Careers
- Nature 
  Conferences

### Regional websites

- Nature Africa
- Nature China
- Nature India
- Nature Italy
- Nature Japan
- Nature Middle East

- Privacy
  Policy
- Use
  of cookies
- Your privacy choices/Manage cookies
- Legal
  notice
- Accessibility
  statement
- Terms & Conditions
- Your US state privacy rights

© 2024 Springer Nature Limited

xml version="1.0" encoding="UTF-8"?
